# Supplementary material for: Uterine Factors Modify the Association Between Embryo Transfer Depth and Clinical Pregnancy: A Retrospective Study in 7849 Fresh Transfer In Vitro Fertilization Cycles
Source: Research Square preprint supplement (doi:10.21203/rs.3.rs-1126916/v1), 2021-12-10
Supplement: Supplementary file 1 [file 7d7a58b820b5410c42f96705.doc]

Supplemental Table 1 Logistic regression analysis of clinical pregnancy per transfer

| Parameters | Categories | OR (95% CI) |
| --- | --- | --- |
| Female` age | per year increased | 0.97(0.957-0.983) |
| GnRH analogues | Antagonist vs agonist | 0.565(0.491-0.65) |
| Previous ET | Per ET increased | 0.978(0.922-1.037) |
| Type of fertility | Primary vs Secondary | 0.98(0.882-1.088) |
| Hydrosalpinix | with vs without | 0.577(0.447-0.744) |
| PCOS | with vs without | 1.096(0.863-1.391) |
| Endometriosis | with vs without | 0.994(0.856-1.155) |
| Male factor | with vs without | 1.088(0.942-1.256) |
| Duration of infertility | per year increased | 0.966(0.951-0.982) |
| AFC | per AFC increased | 1(0.984-1.017) |
| Starting dose of stimulation | per 75 IU increased | 0.752(0.652-0.868) |
| Progesterone elevation | with vs without | 0.820(0.72-0.933) |
| Endometrial thickness | per mm increased | 1.057(1.034-1.08) |
| Endometrial pattern | pattern B vs pattern A | 0.945(0.834-1.071) |
|  | pattern C vs pattern A | 0.794(0.661-0.954) |
| Number of oocyte retrieved | per oocyte increased | 1.023(1.012-1.035) |
| Developmental stage of embryo transferred | blastocyst vs cleavage | 1.947(1.554-2.44) |
| Number of embryo transferred | two vs one | 2.83(2.426-3.301) |
|  | three vs one | 2.844(2.136-3.788) |
| At least one top-quality embryo transferred | yes vs no | 1.365(1.214-1.534) |
| Transfer providers | provider B vs provider A | 0.991(0.826-1.188) |
|  | provider C vs provider A | 1.33(1.119-1.581) |
|  | provider D vs provider A | 0.968(0.803-1.166) |
|  | provider E vs provider A | 1.134(0.959-1.342) |
|  | provider F vs provider A | 1.113(0.912-1.358) |
|  | provider G vs provider A | 0.956(0.729-1.254) |
| BMI categories | <18.5 kg/m2 vs 18.5-24.9 kg/m2 | 0.853(0.739-0.985) |
|  | ≥25 kg/m2  vs 18.5-24.9 kg/m2 | 0.941(0.758-1.167) |
| Catheter tip-fundus distance | per mm increased | 0.974(0.962-0.987) |

Supplemental Table 2 Interaction between transfer providers and the effect of catheter depth on clinical pregnancy rates, derived from a multivariate logistic regression model with live birth as a dependent variable and catheter tip-fundus distance, transfer providers, the interaction term: catheter tip-fundus×transfer providers, age, GnRH analogues, starting dose of stimulation, number of oocytes, endometrial thickness, endometrial pattern, progesterone elevation, number and developmental stage of embryos transferred, presence of top quality embryo, duration of fertility and hydrosalpinix as independent variables)

|  | Ratio of OR for clinical pregnancy | | |
| --- | --- | --- | --- |
|  | Quartile 2 vs Quartile 1 | Quartile 3 vs Quartile 1 | Quartile 4 vs Quartile 1 |
| provider B vs provider A | 0.744(0.463-1.195) | 0.69(0.41-1.159) | 1.029(0.568-1.864) |
| provider C vs provider A | 1.148(0.71-1.854) | 1.252(0.75-2.089) | 1.868(1.049-3.328) |
| provider D vs provider A | 0.669(0.418-1.069) | 0.78(0.461-1.32) | 1.167(0.633-2.151) |
| provider E vs provider A | 0.938(0.61-1.443) | 1.026(0.637-1.652) | 1.156(0.659-2.028) |
| provider F vs provider A | 1.003(0.607-1.657) | 1.015(0.576-1.791) | 1.19(0.625-2.268) |
| provider G vs provider A | 0.674(0.349-1.302) | 0.541(0.251-1.166) | 2.25(0.905-5.595) |
